1           **EgGLUT1 is crucial for the viability of larvae of *Echinococcus***  
2                           ***granulosus sensus lato* by involving its glucose uptake**

3           Kuerbannisha Amahong<sup>a,b\*</sup>, Mingzhi Yan<sup>a,b\*</sup>, Jintian Li<sup>a,b</sup>, Ning Yang<sup>a</sup>, Hui Liu<sup>a</sup>,  
4                           Xiaojuan Bi<sup>a</sup>, Dominique A. Vuitton<sup>c</sup>, Renyong Lin<sup>a, d, e\*\*</sup> and  
5                                                   Guodong Lü<sup>a,b,d\*\*</sup>

6           <sup>a</sup>State Key Laboratory of Pathogenesis, Prevention, and Treatment of Central Asian  
7           High Incidence Diseases, Clinical Medical Research Institute, The First Affiliated  
8           Hospital of Xinjiang Medical University, Urumqi, China

9           <sup>b</sup>College of Pharmacy, Xinjiang Medical University, Urumqi, China

10          <sup>c</sup>University Bourgogne Franche-Comté and French National Reference Centre for  
11          Echinococcosis, Besançon, France

12          <sup>d</sup>WHO Collaborating Centre for Prevention and Care Management of Echinococcosis,  
13          The First Affiliated Hospital of Xinjiang Medical University, Urumqi, China

14          <sup>e</sup>Basic Medical College, Xinjiang Medical University, Urumqi, China

15          \*These authors should be considered joint first authors.

16          \*\* Correspondence to Guodong Lü and Renyong Lin

17          \*\*Corresponding author: Guodong Lü. The First Affiliated Hospital of Xinjiang  
18          Medical University, Room 425, KE JI Building, No. 137 Liyushan Road Urumqi,  
19          Xinjiang 830054. E-mail: [lgd\\_xj@qq.com](mailto:lgd_xj@qq.com). Renyong Lin. The First Affiliated  
20          Hospital of Xinjiang Medical University, Room 425, KE JI Building, No. 137  
21          Liyushan Road Urumqi, Xinjiang 830054. E-mail: [renyonglin@xjmu.edu.cn](mailto:renyonglin@xjmu.edu.cn).

## 22 ABSTRACT

23 Cystic echinococcosis (CE) is a zoonotic parasitic disease caused by infection with  
24 the larvae of *Echinococcus granulosus sensu lato (s.l.)* cluster. It is urgent to identify  
25 novel drug targets and develop new drug candidates against CE. Glucose transporter 1  
26 (GLUT1) is mainly responsible for the transmembrane transport of glucose to  
27 maintain its constant cellular availability and is a recent research hotspot as a drug  
28 target in various diseases. However, presence and role of GLUT1 in *E. granulosus s.l.*  
29 (EgGLTU1) was unknown. In this study, we cloned a conserved GLUT1 homology  
30 gene (named EgGLUT1-ss) from *E. granulosus sensu stricto (s.s.)* and found  
31 EgGLUT1-ss was crucial for glucose uptake of the protoscoleces of *E. granulosus s.s.*  
32 WZB117, a GLUT1 inhibitor, inhibited glucose uptake of *E. granulosus s.s.* and the  
33 viability of the metacestode *in vitro*. In addition, WZB117 showed potent therapeutic  
34 activity in *E. granulosus s.s.*-infected mice: a 10 mg/kg dose of WZB117 significantly  
35 reduced the number and weight of parasite cysts as well as the reference drug,  
36 albendazole. Our data have defined EgGLUT1 as a key *E. granulosus s.l.*  
37 vulnerability target, involved in its glucose uptake from the host; this opens a new  
38 avenue to identify drugs with an ideal activity profile for the treatment of CE.

39 **Keywords:** cystic echinococcosis; glucose transporter 1; glucose uptake; WZB117

## 40 Introduction

41 Cystic echinococcosis (CE) is a chronic and neglected zoonotic parasitic disease  
42 caused by the larvae of the *Echinococcus granulosus sensu lato (s.l.)* cluster and listed

43 as one of 17 neglected tropical diseases by the World Health Organization (WHO) (1).  
44 CE is distributed worldwide, mainly in South America, Eastern Europe, the Middle  
45 East, Russia, and Western China, and the incidence is up to 5% to 10% in highly  
46 endemic areas (2,3). More than 2-3 million cases are estimated worldwide (4).  
47 According to the WHO, the costs globally committed for treating CE are more than  
48 \$3 billion per year (5). China has a high prevalence of human CE, accounting for  
49 40 % of global DALYs lost worldwide (6). Between 2012 and 2016, CE was endemic  
50 in 368 counties, with an estimated 166,098 cases of CE in China (7).

51 The early symptoms of CE are not obvious, and most CE patients are already in  
52 advanced stages when they seek medical treatment (2). This treatment mainly  
53 includes surgical and anti-parasitic drug treatments, but surgery is not always possible  
54 and may be complicated by postoperative recurrence and secondary infection or  
55 biliary leakage (8). For some patients who are not suitable for surgical treatment,  
56 antiparasitic treatment has become the first choice; in this situation, the germinal layer  
57 of the metacestode is the main target of the drug. Anti-parasitic treatment is also used  
58 before and after operation to prevent a recurrence, with the possibly spilled  
59 protoscoleces (PSCs) as main targets (9). Currently, benzimidazoles, mebendazole  
60 and more often albendazole (ABZ), are the only drugs that may be used to treat this  
61 infection at its metacestode stage, as recommended by WHO, but such drugs are  
62 characterized by poor bioavailability, wide inter-individual variations in blood levels,  
63 and occurrence of adverse reactions (10, 11). At present, we are missing anti-CE

64 drugs that can effectively replace ABZ; in addition, the killing potential of ABZ on  
65 PSCs is not optimal, and it is delayed (11). Therefore, the identification of new drug  
66 targets and the development of new therapeutic molecules are of great significance for  
67 the treatment of CE.

68 The results of transcriptome and whole-genome sequencing show that after  
69 entering the intermediate host, the anabolic ability of *E. granulosus s.l.* is severely  
70 degraded, while its ability to absorb nutrients is greatly increased, and complete  
71 metabolic pathways such as glycolysis, tricarboxylic acid cycle and pentose  
72 phosphate cycles function efficiently (12, 13). This suggests that *E. granulosus s.l.*  
73 requires nutrients such as glucose from the intermediate host's environment to meet  
74 basic physiological functions such as energy metabolism. If glucose is not transported  
75 from the host environment in time or cannot be transported to the parasite, the  
76 parasite's death probably occurs, which is suggested by the presence of specific  
77 antibodies to *E. granulosus s.l.* in the serum of patients without lesions in endemic  
78 areas, and the observation of abortive forms of disease (14). It is considered that  
79 interference with glucose metabolism is one of the mechanisms of action of ABZ (15).  
80 However, the precise metabolic chain involved in *E. granulosus s.l.* glucose uptake is  
81 unknown.

82 Glucose transporter 1 (GLUT1) is widely distributed across most cell types and  
83 responsible for the transmembrane transport of glucose (16). In recent years, GLUT1  
84 has gradually become a research hotspot in the field of metabolic diseases, cancer, and

85 other diseases, and is considered as an important target for drug development (17-19).  
86 Recently, Wei *et al.* found that inhibiting the human GLUT1 in the erythrocytes could  
87 alleviate their injury caused by *Plasmodium* spp. Infection (20). For some parasites,  
88 such as *Trypanosoma* spp. and *Leishmania* spp., hexose transporters have been  
89 reported to be involved in the glucose uptake pathway of the parasite (21, 22). In  
90 addition, GLUT1 of *E. multilocularis* was shown to have relatively high glucose  
91 transport activity and to be a crucial participant in the parasite glucose metabolism  
92 (23). WZB117, which binds to the GLUT1 at the exofacial sugar binding site, is a  
93 reversible competitive inhibitor of glucose uptake and exchange glucose transport  
94 (24), and has now been shown to have therapeutic effects in cancer (25) and  
95 *Plasmodium* infection (20). However, we currently do not know whether GLUT1 can  
96 be an important drug target in echinococcosis treatment and whether its inhibitor  
97 WZB117 has an anti-cystic echinococcosis effect.

98 In our study, we tested whether we could affect *E. granulosus s.l.* glucose uptake  
99 by targeting EgGLUT1 at the metacestode stage of *E. granulosus s.l.*. We thus cloned  
100 a conserved GLUT1 homology gene from *E. granulosus sensu stricto (s.s.)*, the  
101 species most widely responsible for CE cases worldwide, and inhibited EgGLUT1 by  
102 WZB117 to study its possible impact on the survival of the metacestode *in vitro* and  
103 in an experimental animal model.

## 104 **Results**

### 105 **Cloning, and physiological and biochemical characterization of EgGLUT1-ss**

106 To assess whether GLUT1 gene was present in *E. granulosus s.s.*, we  
107 successfully cloned a conserved GLUT1 homologous gene from *E. granulosus s.s.*,  
108 named EgGLUT1-ss (accession number: MW393831) (Supplementary Figure 1),  
109 which consists of 500 amino acids (Figure 1a). Bioinformatics analysis showed that  
110 EgGLUT1-ss had one major facilitator superfamily (MFS) domain and 12  
111 transmembrane regions, which were a typical feature of the GLUT gene (Figure 1a).  
112 This special structure plays an important role in the transmembrane transport of  
113 glucose (26). In addition, we also found that EgGLUT1-ss contained two amidation  
114 sites, one glycosylation site, one cAMP- and cGMP-dependent protein kinase  
115 phosphorylation site, two casein kinase II phosphorylation sites, five myristoylation  
116 sites, and five protein kinase C phosphorylation sites (Figure 1a). Whole sequence  
117 alignment analysis showed that the highest overall homologies on the amino acid  
118 sequence level could be detected between EgGLUT1-ss and the GLUT1 of *E.*  
119 *multilocularis* (96.81% identical); and GLUT1 orthologs were found in various other  
120 species (with a 32.77% to 72.33% homology) (Figure 1a). Phylogenetic analysis  
121 revealed that the EgGLUT1-ss gene was generally closely related to parasite species  
122 GLUT genes, especially helminths, and was more distantly related to mammalian  
123 species such as human and mouse GLUT genes (Figure 1b).

#### 124 **EgGLUT1-ss Knockdown reduces the viability and glucose uptake of *E.*** 125 ***granulosus s.s.* PSCs**

126 To investigate EgGLTU1 function in *E. granulosus s.l.*, we examined the

127 EgGLUT1-ss expression in PSCs and vesicles of *E. granulosus s.s.*. We found  
128 EgGLUT1-ss was expressed in both PSCs and vesicles, and EgGLUT1-ss expression  
129 level in PSCs was 3.5 times higher than that of vesicles (Figure 2a).

130 To determine the functional relevance of EgGLUT1-ss in PSCs,  
131 we designed three siRNA sequences (siRNA-386/578/723) targeting EgGLUT1-ss.  
132 The siRNA-386/578/723 treatment led to a significant reduction in  
133 EgGLUT1-ss-mRNA expression of PSCs (Figure 2b) and decreased PSCs viability  
134 considerably (Figure 2c). To examine the influence of EgGLUT1-ss knockdown on  
135 the glucose uptake of PSCs, siRNA-386/578/723 were transfected into PSCs, and 2  
136 days after transfection, 2-NBDG uptake by PSCs decreased significantly (Figure 2d).

137 **WZB117 inhibits glucose metabolism and reduces the viability of *E. granulosus***  
138 ***s.s.* PSCs *in vitro***

139 By docking predictions, we found that WZB117 had the potential ability to  
140 combine with EgGLUT1-ss. The binding of WZB117 to EgGLUT1-ss involved four  
141 hydrogen bonds, with Arg120, Asn29, Asn285 and Gln280. Amino acid residues  
142 Phe66, Thr25, Val63, Phe289, Ala286, and Trp410 interacted with the WZB117  
143 molecule through hydrophobic bonds (Figure 3a). After 60 min incubation with  
144 WZB117 *in vitro*, the glucose uptake level of PSCs was significantly decreased  
145 (Figure 3b). After 48 hours incubation with 25, 50, and 100  $\mu\text{mol/L}$  WZB117 *in vitro*,  
146 the glucose content of PSCs was significantly decreased (Figure 3c). In parallel, the  
147 ATP content was decreased (Figure 3d) when the PSCs were treated with 50 and 100

148  $\mu\text{mol/L}$  WZB117.

149 To investigate the WZB117 inhibition effect on the viability of *E. granulosus s.s.*  
150 larval stages *in vitro*, we analyzed the survival rate of PSCs exposed to various  
151 WZB117 concentrations. As shown in Figure 3e, compared to the control group, 4  
152 days-WZB117 exposure led to a dose-dependent decrease in the viability of PSCs in  
153 cultures. After exposure to 100  $\mu\text{mol/L}$  WZB117 *in vitro* for one day, all the PSCs  
154 died. Scanning electronic microscopy (SEM) showed that, compared to the control  
155 group, WZB117-treated PSCs exhibited incomplete rostellum structure, absence of  
156 hooks, collapsed suckers and various damages to the other structures of the PSCs, as  
157 shown in Figure 3f. Transmission electronic microscopy (TEM) showed that there  
158 were significant changes in the ultrastructure of WZB117-treated PSCs: the  
159 microtriches disappeared, the nuclei were ruptured, associated with disappearance of  
160 the nucleoli, and vacuoles appeared in the cytoplasm. (Figure 3g).

#### 161 **WZB117 reduces the viability of *E. granulosus s.s.* vesicles *in vitro***

162 Cysts are the lesions produced by *E. granulosus s.l.* in the intermediate host and  
163 their development is related to the pathogenicity of this helminth (2). Therefore, we  
164 further explored the effect of WZB117 on such *in vitro*-cultured vesicles exposed to  
165 increasing concentrations of WZB117. The viability of the vesicles was significantly  
166 decreased when they were exposed to various concentrations of WZB117 for 4 days;  
167 it was decreased by 100% on day 3 when exposed to 100  $\mu\text{mol/L}$  WZB117 (Figure  
168 4a). These data and morphological changes indicate that WZB117 had a significant



169 effect on the reduction of the viability of *in vitro*-developed *E. granulosus s.s.* vesicles.  
170 Compared with the control group, the SEM features of the vesicles in the WZB117  
171 group changed significantly: the germinal layer was condensed, and the vesicles  
172 collapsed. The degree of collapse was positively correlated with the dose of  
173 WZB117 (Figure 4b). TEM images obtained from the WZB117-treated vesicles  
174 showed that the structures of germinal layer and laminated layer were damaged, lipid  
175 droplet appeared, the microtriches were reduced, nucleoli disappeared, the  
176 heterochromatin edges were clustered, and the cortical matrix was fuzzy (Figure 4c).

177 **WZB117 treatment affects glucose/ATP levels and effectively prevents the growth**  
178 **and of cysts in *E. granulosus s.s.*-infected mice**

179 We measured the glucose and ATP content of the cysts *in vivo*. There was a  
180 marked reduction in glucose and ATP levels in the cyst tissue; the reduction was less  
181 marked in the cyst fluid (Figure 5a and b). A significant reduction of glucose and ATP  
182 levels in the cyst fluid was observed for the 20 mg/kg dose of WZB117 (Figure 5c and  
183 d).

184 After 6 months of WZB117 treatment, the weight of cysts recovered from  
185 WZB117-treated mice was significantly lower than that recovered from the control  
186 group (Figure 5e). Additionally, the number and diameter of cysts in WZB117-treated  
187 mice were lower than those of the control group (Figure 5f and g). Overall, the  
188 ‘therapeutic’ effect of 10 mg/kg WZB117 was comparable to that of ABZ (Figure 5h).

189 In the control group (Figure 5i), the cysts had no significant structural

190 abnormalities when observed with TEM. However, the structure of cysts removed  
191 from the treated groups was damaged at different degrees (Figure 5i). Compared with  
192 the control group, cysts from WZB117-treated mice had loose germinal layers, the  
193 microtriches were shortened and reduced dramatically in length, the tegument was  
194 thinned, the structure of the laminated layer was destroyed, and the nuclei were  
195 condensed.

196 For a preliminary assessment of the safety of WZB117 in the treatment of CE in  
197 experimental hosts, we measured the usual indices of adverse effects. There were no  
198 differences in body weight between treated and control mice. The aspartate  
199 transaminase (AST) level was significantly lower in the 5 mg/kg WZB117-treated  
200 groups than in the control group (Supplementary Figure 2a) and there were no  
201 significant differences in alanine aminotransferase (ALT) and alkaline phosphatase  
202 (ALP) levels, the most accurate markers of liver damage (Supplementary Figure 2b  
203 and c). The 5 mg/kg WZB117-treated group had lower blood urea levels than the  
204 control group (Supplementary Figure 2d) but all observed values remained in the  
205 physiological range and creatinine levels were similar in all WZB117-treated groups  
206 and in the control group (Supplementary Figure 2e). Blood glucose levels were also  
207 not different in WZB117-treated mice and in control mice (Supplementary Figure 3).  
208 Overall, WZB117, at the dosages used in our study did not cause significant toxicity  
209 in mice.

## 210 Discussion

211 The energy-associated metabolic pathways are essential for the survival of  
212 parasites and their adaptation to their successive hosts (27); glucose metabolism is the  
213 main energy source (12). Glucose metabolism pathways, especially glycolysis, had  
214 been evidenced as a target for anti-echinococcosis drugs (28). However, the upstream  
215 pathway of glucose metabolism in *E. granulosus s.l.*, which is involved in glucose  
216 uptake from the host, was still elusive. In this study, we identified EgGLUT1-ss as a  
217 crucial protein involved in glucose uptake by *E. granulosus s.s.* metacestode and  
218 demonstrated that functional EgGLUT1-ss was essential for energy-sourcing and  
219 survival in the intermediate host of the parasite. We also characterized EgGLUT1-ss  
220 as an important drug target against this larval stage and its inhibitor WZB117 as a  
221 candidate anti-CE drug.

222 Glucose metabolism pathway not only produces ATP for the physiological  
223 functions of eucaryote cells, but also provides an important source of carbon to  
224 support the biosynthesis of nucleotides and non-essential amino acids (29). *E.*  
225 *granulosus s.l.* produces ATP for its own growth by both aerobic and anaerobic  
226 carbohydrate metabolism pathways (30). Tsai *et al.* (12) and Zheng *et al.* (13) found  
227 that *E. granulosus s.l.* has complete glucose metabolism pathways, including  
228 glycolysis, the tricarboxylic acid cycle, and the pentose phosphate pathway. Wu *et al.*  
229 (31) showed that glycolytic enzyme, triosephosphate isomerase, as a drug target for  
230 the control of schistosomes (32) and of *Plasmodium* spp. (33), was also involved in  
231 the growth and development of *E. granulosus s.l.*. In addition, other glycolytic

232 enzymes, such as 6-phosphofructokinase 1 and pyruvate kinase, have been identified  
233 in *E. granulosus s.l.* (34), and Hemer *et al.* (35) showed that the insulin receptor  
234 pathway could regulate *E. multilocularis* glucose metabolism. In this study, we found  
235 that suppressing the function of EgGLUT1-ss, a member of the glucose transporter 1  
236 family that we cloned from *E. granulosus s.s.*, the species most frequently responsible  
237 for CE worldwide, not only inhibited glucose uptake and ATP content by *E.*  
238 *granulosus s.s.*, but also affected the viability of both vesicles and PSCs of *E.*  
239 *granulosus s.s. in vitro* and cysts developed *in vivo*. Glucose, a polar and hydrophilic  
240 molecule, cannot pass through hydrophobic cell membranes; GLUT1, which is  
241 embedded in the cell membrane, carries out the function of glucose transport to  
242 provide glucose supply (36-38). GLUT1-like transporters have been identified in  
243 trypanosomes such as *T. brucei*, and *T. cruzi*, and in *Leishmania* spp. (39), as well as  
244 in *E. multilocularis*, another species of the *Echinococcus* genus; in that species,  
245 EmGLUT1 has a high glucose transport activity and likely plays an important role in  
246 glucose uptake from its host at the larval stage (23). Like *E. multilocularis*, *E.*  
247 *granulosus s.l.* is also dependent on its intermediate host-derived glucose; we may  
248 thus suggest that EgGLUT1, a crucial upstream member of glucose metabolism  
249 pathways acting as a switch for glucose to enter the parasite, serves as an  
250 energy-provider from the host's glucose to the *E. granulosus s.l.* metacestode, and is  
251 thus essential for its growth and survival.

252 The systemic anti-parasitic treatment of CE currently relies on the continuous

253 administration of either of two benzimidazole carbamates, ABZ and mebendazole,  
254 which are the only drugs clinically efficient to interrupt the larval growth of *E.*  
255 *granulosus s.l.* Both drugs interfere with glucose metabolism: their mechanism of  
256 action has been associated with a marked inhibition of pyruvate kinase,  
257 phosphoenolpyruvate carboxykinase and ATPase (40). In addition, a few bioenergetic  
258 modulators have shown significant inhibition of parasite viability in preclinical *in vivo*  
259 and *in vitro* experiments. As examples, 3-bromopyruvate which blocks glucose entry  
260 into the glycolysis pathway by inhibiting hexokinase (HK) (41) has been shown to  
261 inhibit *Echinococcus* spp. viability *in vitro* and *in vivo* (28); tacrolimus, a  
262 rapamycin-target protein inhibitor, exerts anti-CE effects *in vivo* and *in vitro* and  
263 affects the glucose metabolism of cysts *in vivo* (42); and metformin can reduce the  
264 larval viability of *E. granulosus s.l.* by inhibiting its glucose metabolism pathway (43).  
265 However, none of these compounds have succeeded in reaching the pre-clinical stage  
266 of drug development for CE.

267 Synthetic GLUT1 inhibitors, such as BAY-876, WZB117 and STF-31, are still in  
268 the pre-clinical research stage, but there are obvious experimental data showing that  
269 the inhibition of glucose uptake they achieve has a real therapeutic potential (44-46).  
270 Previous studies have reported that WZB117 significantly inhibits the proliferation of  
271 cancer cells by reducing the transporter function of GLUT1 (47-49) which was  
272 overexpressed in cancer cells (50), maybe through the reduction of ATP and glycolytic  
273 enzyme levels. Resveratrol, which has a GLUT1 inhibitory effect, has been endorsed

274 by the FDA for the treatment of spinocerebellar ataxia (51). WZB117 was also shown  
275 to inhibit the growth of blood-stage *P. berghei* and reduce glucose uptake in the red  
276 blood cells by breaking redox balance (20). In our study, we found that GLUT1  
277 inhibitor WZB117 significantly reduced the viability of *E. granulosus s.s.*. Our *in*  
278 *vitro* results showed that WZB117 inhibited the function of EgGLUT1-ss, leading to a  
279 reduction in glucose and ATP levels, which ultimately led to the death of both the  
280 PSCs and metacestode vesicles *in vitro*. In our *in vivo* experiments, we found that  
281 WZB117 achieved the same therapeutic results as ABZ, at a lower dose. The lower  
282 levels of glucose content in the cyst wall and the cyst fluid we found in the mice  
283 treated by WZB117 may suggest that WZB117 could be slightly more effective than  
284 ABZ; which may be due to the different targets of the two drugs, inhibition of  
285 cytoplasmic and mitochondrial malate dehydrogenase for ABZ (52) on one hand, and  
286 EgGLUT1-ss function in glucose uptake and transport for WZB117 on the other hand.  
287 The lower anti-CE effect of ABZ may also be related to its poor solubility, thus low  
288 cell availability, a well-known disadvantage for its clinical use in the treatment of  
289 echinococcosis (8-11). The dual and rapid effect of WZB117 on PSCs and the  
290 germinal layer of the metacestode is a supplementary advantage of the GLUT1  
291 inhibitor for its use in CE in the peri-operative period to prevent the development of  
292 secondary cysts. Considering the rather frequent adverse effects of ABZ taken at the  
293 high dosage necessary to treat CE, and especially its liver toxicity often responsible  
294 for drug withdrawal in patients who depend on the drug for their survival (11),

295 WZB117 may likely become an alternative drug to ABZ not only for CE but also AE  
296 for which ABZ use is inescapable.

297 Most of the candidate drugs that were promising, from *in vitro* and experimental  
298 studies, against CE and AE have not reached the pre-clinical stage because of adverse  
299 effects even superior to those of ABZ (53). Even though it is a promising strategy  
300 for the treatment of CE, we cannot ignore the potential adverse effects of WZB117 on  
301 the host. It has been previously reported that WZB117 inhibits facilitated glucose  
302 transport by competing with sugars for occupancy of the exofacial substrate binding  
303 site of the transporter (24). Prolonged inhibition of glucose transport could  
304 compromise the normal cellular glycolysis of the host, affect host insulin secretion  
305 and cause host's cerebral energy failure (54). Completing a thorough analysis of all  
306 possible adverse events was beyond the scope of this study; however, we conducted a  
307 preliminary safety assessment of WZB117 in its use to treat CE, in the murine  
308 experimental model. We found no abnormalities in body weight and blood glucose in  
309 our mice treated with WZB117 for 28 days. There were no significant changes in the  
310 biological parameters under study, especially regarding liver toxicity. Our treatment  
311 cycle was only 4 weeks; long-term safety still needs to be further evaluated, since  
312 hyperglycemia and lipodystrophy were reported after long-term administration of  
313 WZB117 (25); however, our data are very promising to launch pre-clinical studies on  
314 peri-operative anti-parasitic treatment of CE, since 1 month is the usual recommended  
315 duration of treatment in this situation. The results of our bioinformatics analysis show

316 that the GLUT1 gene sequences of *E. granulosus s.s.* differ significantly from other  
317 species, which may true for all species within the *E. granulosus s.l.* cluster but this  
318 should be specifically tested whenever the sequences of GLUT1 from other species  
319 become available. The design of GLUT1 inhibitors more selective for the protein  
320 structure of EgGLUT1 should also be the focus of future developments on CE drugs  
321 to avoid interference with the host's GLUT1 while conserving therapeutic efficacy.

## 322 **Materials and methods**

### 323 **Chemicals**

324 WZB117 and albendazole sulfoxide (ABZSO) were obtained from MedChem  
325 Express (USA), and dimethyl sulfoxide (DMSO) and ABZ from Sigma (USA).

### 326 **Ethics statement**

327 All procedures carried out with animals were approved by the Ethical Committee  
328 of the First Affiliated Hospital of Xinjiang Medical University  
329 (IACUC-20130425012). At the end of treatment, all mice were euthanized to avoid  
330 the pain of animals to the greatest extent.

### 331 **Parasite collection and culture**

332 Sterile PSCs were obtained aseptically from the cysts of sheep infected with *E.*  
333 *granulosus sensu stricto (s.s.)* in the Hualing slaughter market of Urumqi in Xinjiang,  
334 PR China. All experiments were conducted on this species. Viable and  
335 morphologically intact PSCs were cultured using RPMI-1640 medium (Gibco, USA)  
336 (10% fetal bovine serum, 100 U/ml penicillin, and 100 µg/ml streptomycin), and



337 maintained at 37°C under a humidified atmosphere containing 5% CO<sub>2</sub> (55, 56). For  
338 *in vitro* experiments on *E. granulosus* s.s. metacestode, *in vitro* sterile cultures were  
339 maintained for 4 months to obtain vesicles with a diameter of approximately 2 mm.

#### 340 **Experimental infection of mice with *E. granulosus* s.s. PSCs**

341 Healthy female Kunming mice (20 ± 2 g of 8 weeks old) were adaptively reared  
342 by the Experimental Animal Center of Xinjiang Medical University for one week  
343 under controlled laboratory conditions (temperature 20 ± 2°C and 50 ± 5% humidity)  
344 (43). The mice were inoculated with 2,000 PSCs in 0.2 mL normal saline by  
345 intraperitoneal injection. After 6 months, the mice were examined by B-scan  
346 ultrasonography; when the diameter of the lesion was more than 0.5 cm, this indicated  
347 that the infection was successful.

#### 348 **WZB117 treatment *in vitro***

349 For a first set of experiments, after PSCs were cultured *in vitro* for one week,  
350 their viability was tested by 1% eosin staining; to be used in the study, the required  
351 percentage of viability required was higher than 90% (57). *In vitro* PSCs treatments  
352 were performed with 3.125, 6.25, 12.5, 25, 50 and 100 µmol/L WZB117 (dissolved in  
353 DMSO). For a second set of experiments, the PSC-derived vesicles were cultured *in*  
354 *vitro* for four months and then cultured in a 6-well plate (25 vesicles /well). *In vitro*  
355 vesicle treatments were performed with 3.125, 6.25, 12.5, 25, 50 and 100 µmol/L  
356 WZB117 and 15 µmol/L ABZSO. For both control PSCs and vesicles, the culture  
357 medium with an identical amount of DMSO (without inhibitor; final concentration,

358 1%) was used, and the PSCs and vesicles were cultured in an incubator (5% CO<sub>2</sub>,  
359 37°C) for 4 days, and each viability test was repeated three times. The collapse of  
360 vesicles, loss of swelling and contraction of germinal layer were used as criteria for  
361 evaluating vesicle viability (58). Viability of PSCs and vesicles was observed under a  
362 microscope every 24 hours (59). Each experiment was performed in triplicate and  
363 repeated three times.

### 364 **Glucose Uptake Assay**

365 Glucose uptake levels were measured using the  
366 2-[N-(7-nitrobenz-2-oxa-1,3-diazol-4-yl) amino]-2-deoxy-D-glucose (2-NBDG) (final  
367 concentration, 100 µmol/L) assay. Briefly, the PSCs with siRNA sequence or the  
368 WZB117-treated PSCs were incubated at 37°C for 48 hours. Then, the PSCs were  
369 incubated in the darkness with 2-NBDG for 180 min and 60 min at 37°C in 5% CO<sub>2</sub>  
370 humidified atmosphere. The fluorescence intensity was detected at the excitation  
371 wavelength of 466 nm and emission wavelength of 540 nm by the fluorescence  
372 marker.

### 373 **WZB117 treatment *in vivo***

374 For *in vivo* experiments, WZB117 was dissolved in PBS/DMSO (1:1, v/v) (25).  
375 All *E. granulosus s.s.*-infected mice (n = 45) judged appropriate at the 6<sup>th</sup> month after  
376 infection (see above) were randomly divided into five experimental groups: control  
377 group (receiving injections of the PBS/DMSO solvent), ABZ (50 mg/kg/day) group  
378 (60) and WZB117 (5, 10, 20 mg/kg/day) groups (20). After 28 days of continuous

379 intraperitoneal injection (dosage: 0.1 mL/10 g per mouse), animals were sacrificed by  
380 cervical dislocation (57). At necropsy, the peritoneal cavity was opened, the number  
381 of cysts was counted, cyst weights and diameters were measured. The efficacy of  
382 treatments was calculated as follows:  $100 \times \{(\text{average cyst weight in the control}$   
383  $\text{group}) - (\text{average cyst weight in the treatment group})\} / (\text{average cyst weight in the}$   
384  $\text{control group})$  (57).

### 385 **Ultrastructure observations of WZB117 treated PSCs, vesicles, and cysts**

386 After *in vitro* and *in vivo* drug treatment, the PSCs, vesicles, or cysts were fixed  
387 with 4% glutaraldehyde for 24 h (28). The samples were processed for SEM using a  
388 JEOL1230 (JEOL company, Japan) microscope and TEM using a LEO1430VP (LEO  
389 company, Germany) microscopy, as previously described.

### 390 **Glucose and ATP content measurements**

391 To determine the glucose and ATP content of cysts in treated mice, the cysts were  
392 washed three times with precooled PBS and added with 100  $\mu$ L of 20 mM Tris buffer  
393 (Thermo, USA). The cyst wall was homogenized in a homogenizer for 2~4 minutes  
394 and boiled in a water bath for 5 minutes before centrifugation (at 15,800 g at 4°C for  
395 30 min) (61). The cyst fluid was processed by gradient dilution according to the  
396 instructions in the kit. Glucose Colorimetric Assay Kit (Cayman, USA) was used to  
397 determine glucose contents. The ATP content was detected by the ATP Detection  
398 Assay Kit (Cayman, USA). Each experiment was repeated three times.

### 399 **EgGLUT1-ss cloning**

400 Total RNA was extracted from *E. granulosus s.s.* PSCs by Mini BEST Universal  
401 RNA Extraction Kit (Takara, Japan). Me Script II 1<sup>st</sup> Strand cDNA Synthesis Kit  
402 (Takara, Japan) was reverse transcriptionally synthesized for 1<sup>st</sup> cDNA. The reaction  
403 conditions were: incubation at 42°C for 60 min, heating at 95°C for 5 min, termination  
404 of the reaction, and storage at -20°C (62). We used the 1<sup>st</sup> cDNA synthesized by  
405 reverse transcription as a template and used the Premix Ex Taq™ Hot Start Version  
406 (Takara, Japan) to amplify the full-length sequence of the EgGLUT1-ss gene, primers  
407 for the target genes include: EgGLUT1-ss (forward primer 5'-  
408 ATGGTAACTTTCACCTACGT-3' and reverse primer  
409 5'-CTAAAATCTGACCTTATCG-3'). The PCR amplification conditions were:  
410 pre-denaturation at 94°C for 5 min; denaturation at 98°C for 30 s; annealing at 45°C  
411 for 30 s; extension at 72°C for 90 s, for a total of 34 cycles. The reaction was  
412 terminated after 10 min extension at 72°C; 1% agarose gel was used to determine  
413 whether the gene band location was expected. PCR products of EgGLUT1-ss gene  
414 were recovered from Agarose Gel with Agarose Gel DNA Extraction Kit (Takara,  
415 Japan), and the amplified fragments were cloned into pMD19-T vector with Mighty  
416 ta-cloning Reagent Set for Prime STAR (Takara, Japan), and verified by sequencing.  
417 The gene was named as EgGLUT1-ss (accession number: MW393831).

#### 418 **Bioinformatics analysis and construction of the phylogenetic tree of GLUT1**

419 The amino acid sequences of the homologous genes of GLUT1 in *E.*  
420 *multilocularis* (GenBank ID: CDS42031.1), *Hymenolepis microstoma* (GenBank ID:

421 CDS25463.1), *Caenorhabditis elegans* (GenBank ID: NP\_493981.1), *Drosophila*  
422 *melanogaster* (GenBank ID: NP\_001097467.1), *Labrus bergylta* (GenBank ID:  
423 XP\_020502389.1), *Astyanax mexicanus* (GenBank ID: XP\_007258287.2),  
424 *Xiphophorus maculatus* (GenBank ID: XP\_023187106.1), *Aplysia californica*  
425 (GenBank ID: XP\_012944940.1), *Biomphalaria glabrata* (GenBank ID:  
426 XP\_013087453.1), *Crassostrea gigas* (GenBank ID: XP\_019925400.1), *Danio rerio*  
427 (GenBank ID: NP\_001034897.1), *Mus musculus* (GenBank ID: XP\_006502971.1)  
428 and *Homo sapiens* (GenBank ID: NP\_006507.2) were obtained from GenBank. The  
429 post-translational modification sites were predicted using the MotifScan software (63).  
430 The transmembrane region was predicted using TMHMM (64). The conserved  
431 domain was predicted using GenBank tools. The multiple sequence alignment was  
432 analyzed by DNAMAN (Version 7.0.2.176). The phylogenetic tree was constructed  
433 by MEGA (Version 10.0.5).

#### 434 **EgGLUT1-ss-siRNA interference**

435 According to the cloned EgGLUT1-ss Gene sequence (accession number:  
436 MW393831), siRNA interference sequences of three EgGLUT1-ss genes were  
437 designed using Gene Pharma siRNA Designer 3.0 software. Experimental groups:  
438 EgGLUT1-ss-treated groups (siRNA-386/578/723); negative control group (NC,  
439 transfection independent interference sequence); untreated groups. The  
440 siRNA-386/578/723 were transfected into PSCs cultured *in vitro* by electroporation.  
441 The targeting sequence of each siRNA in EgGLUT1-ss cDNA is summarized in Table

442 1. The EgGLUT1-ss-siRNA interference assay was carried out as previously  
443 described (65). Briefly, Electroporation was performed at 125 V using a pulse. For  
444 electroporation, 200  $\mu$ L electroporation buffer (5 mM magnesium chloride, 200 mM  
445 glucose, 20 mM Tris, 2 mM 2-Hydroxy-1-ethanethiol, pH adjusted to 7.4 with HCl)  
446 containing approximately 4,000 PSCs was placed in a 4-mm cuvette, and the final  
447 concentration of siRNA interference sequence was 5  $\mu$ M. After electroporation, the  
448 shock cup was placed in a 37°C incubator for 30 min and then transferred to a 6-well  
449 plate with 2 mL mixed medium for 48 h. After washing with PBS, PSCs in each group  
450 were stained with 1% eosin for 5 min, respectively. The viability was calculated on  
451 smears by counting using an inverted fluorescence microscope.

#### 452 **Quantitative real-time polymerase chain reaction (qRT-PCR) detection**

453 Total RNA was extracted from PSCs and vesicles by Mini BEST Universal RNA  
454 Extraction Kit (Takara, Japan), as previously described (66). RNA was converted to  
455 cDNA with the PrimeScript™ RT reagent Kit Prime Script TMRT reagent Kit (Takara,  
456 Japan), and the cDNA was analyzed by qRT-PCR using TB Green® Premix Ex Taq™  
457 II (Takara, Japan). The primer sequences are shown in Table 2. All samples were run  
458 in triplicate using the following cycle parameters: 95°C for 30 s; 40 cycles at 95°C for  
459 5 s and 55°C for 30 s; 72°C for 1 min; from 95°C, the temperature dropped to 65°C at  
460 a rate of 20.0°C/s. After incubation for 15 s at 65°C, the temperature was increased to  
461 95°C at a rate of 20.0°C/s. All data were used for standard curve analysis.

#### 462 **Docking study**

463 Through the Pubchem website (<https://pubchem.ncbi.nlm.nih.gov/> ) to retrieve  
464 the 3D structure of WZB117, we adopted the Autodock software (version 4.2.6) to  
465 hydrogenation processing, calculating charge EgGLUT1-ss protein, and setting the  
466 receptor proteins docking lattice parameter. We used AutoDock Vina (version 1.1.2) to  
467 dock EgGLUT1-ss and WZB117 and obtained 20 conformations. EgGLUT1-ss and  
468 WZB117 were used to chart the binding sites and amino acid residues and PyMOL  
469 (version 2.4.0) was used as a 3D diagram to show the interaction between receptor  
470 proteins and ligand small molecules.

#### 471 **Statistical analysis**

472 For the comparison between experimental and control data, Student's t-test and  
473 chi-square test were used to determine its significance. All data were expressed as  
474 (arithmetic mean  $\pm$  standard deviation), and  $P$  values are indicated in each assay ( $*P <$   
475  $0.05$ ,  $**P < 0.01$ ). All analyses were performed using IBM SPSS Statistics 20  
476 software.

#### 477 **Linguistic statement**

478 The terminology proposed by the World Association of Echinococcosis was  
479 followed all along the text of the publication. Especially, we followed the distinction  
480 between 'vesicles', obtained *in vitro*, and 'cysts' obtained from *in vivo* experiments,  
481 and between *E. granulosus sensu lato* for the cluster of species previously known as  
482 '*E. granulosus*' and '*E. granulosus sensu stricto*' for the species used in our  
483 experiments (67).

## 484 **Acknowledgements**

485 This research was supported by the National Natural Science Foundation of  
486 China (NSFC) (82060373, 81760369 and 81360251); State Key Laboratory of  
487 Pathogenesis, Prevention and Treatment of Central Asian High Incidence Diseases  
488 Fund (SKL-HIDCA-2020-BC3); "Tianshan Cedar" Science and Technology  
489 Innovation Talents Support Plan of Xinjiang Uygur Autonomous Region  
490 (No. 2019XS13). The funders had no role in study design, data collection and  
491 interpretation, or the decision to submit the work for publication.

492 We thank Zhiqiang Li of the Animal Experiment Center of Xinjiang Medical  
493 University for providing help with animal experiments and Haiyan Ren of the  
494 Department of Electron Microscopy of Xinjiang Medical University for providing  
495 technical support in the use of electron microscopes.

## 496 **Transparency declarations**

497 None to declare.

## 498 **References**

- 499 1. Larrieu E, Gavidia CM, Lightowlers MW. 2019. Control of cystic  
500 echinococcosis: Background and prospects. *Zoonoses Public Health*  
501 66:889-899.



- 502 2. Wen H, Vuitton L, Tuxun T, Li J, Vuitton DA, Zhang W, McManus DP. 2019.  
503 Echinococcosis: Advances in the 21st Century. *Clin Microbiol Rev* 32:  
504 e00075-18.
- 505 3. Agudelo Higueta NI, Brunetti E, McCloskey C. 2016. Cystic Echinococcosis. *J*  
506 *Clin Microbiol* 54:518-23.
- 507 4. Craig PS, McManus DP, Lightowers MW, Chabalgoity JA, Garcia HH,  
508 Gavidia CM, Gilman RH, Gonzalez AE, Lorca M, Naquira C, Nieto A,  
509 Schantz PM. 2007. Prevention and control of cystic echinococcosis. *Lancet*  
510 *Infect Dis* 7:385-94.
- 511 5. WHO. 2019 [cited 1 Nov 2019]. Echinococcosis.  
512 <https://www.who.int/news-room/fact-sheets/detail/echinococcosis>.
- 513 6. Budke CM, Deplazes P, Torgerson PR. 2006. Global socioeconomic impact of  
514 cystic echinococcosis. *Emerg Infect Dis* 12:296-303.
- 515 7. Qian MB, Zhou XN. 2018. Walk together to combat echinococcosis. *Lancet*  
516 *Infect Dis* 18:946.
- 517 8. Brunetti E, Kern P, Vuitton DA. 2010. Expert consensus for the diagnosis and  
518 treatment of cystic and alveolar echinococcosis in humans. *Acta Trop*  
519 114:1-16.
- 520 9. Kern P, Menezes da Silva A, Akhan O, Müllhaupt B, Vizcaychipi KA, Budke  
521 C, Vuitton DA. 2017. The Echinococcoses: Diagnosis, Clinical Management  
522 and Burden of Disease. *Adv Parasitol* 96:259-369.

- 523 10. Horton J. 2002. Albendazole: a broad spectrum anthelmintic for treatment of  
524 individuals and populations. *Curr Opin Infect Dis* 15:599-608.
- 525 11. Horton J. 2003. Albendazole for the treatment of echinococcosis. *Fundam Clin*  
526 *Pharmacol* 17:205-12.
- 527 12. Tsai IJ, Zarowiecki M, Holroyd N, Garcarrubio A, Sanchez-Flores A, Brooks  
528 KL, Tracey A, Bobes RJ, Fragoso G, Sciutto E, Aslett M, Beasley H, Bennett  
529 HM, Cai X, Camicia F, Clark R, Cucher M, De Silva N, Day TA, Deplazes P,  
530 Estrada K, Fernandez C, Holland PWH, Hou J, Hu S, Huckvale T, Hung SS,  
531 Kamenetzky L, Keane JA, Kiss F, Koziol U, Lambert O, Liu K, Luo X, Luo Y,  
532 Macchiaroli N, Nichol S, Paps J, Parkinson J, Pouchkina-Stantcheva N,  
533 Riddiford N, Rosenzvit M, Salinas G, Wasmuth JD, Zamanian M, Zheng Y,  
534 Cai J, Soberon X, Olson PD, Lacleste JP, et al. 2013. The genomes of four  
535 tapeworm species reveal adaptations to parasitism. *Nature* 496:57-63.
- 536 13. Zheng H, Zhang W, Zhang L, Zhang Z, Li J, Lu G, Zhu Y, Wang Y, Huang Y,  
537 Liu J, Kang H, Chen J, Wang L, Chen A, Yu S, Gao Z, Jin L, Gu W, Wang Z,  
538 Zhao L, Shi B, Wen H, Lin R, Jones MK, Brejova B, Vinar T, Zhao G,  
539 McManus DP, Chen Z, Zhou Y, Wang S. 2013. The genome of the hydatid  
540 tapeworm *Echinococcus granulosus*. *Nat Genet* 45:1168-75.
- 541 14. Wang Y, He T, Wen X, Li T, Waili A, Zhang W, Xu X, Vuitton DA, Rogan  
542 MT, Wen H, Craig PS. 2006. Post-survey follow-up for human cystic  
543 echinococcosis in northwest China. *Acta Trop* 98:43-51.

- 544 15. Son DS, Lee ES, Adunyah SE. 2020. The Antitumor Potentials of  
545 Benzimidazole Anthelmintics as Repurposing Drugs. *Immune Netw* 20:e29.
- 546 16. Takata K, Kasahara T, Kasahara M, Ezaki O, Hirano H. 1990.  
547 Erythrocyte/HepG2-type glucose transporter is concentrated in cells of  
548 blood-tissue barriers. *Biochem Biophys Res Commun* 173:67-73.
- 549 17. Xiao H, Wang J, Yan W, Cui Y, Chen Z, Gao X, Wen X, Chen J. 2018.  
550 GLUT1 regulates cell glycolysis and proliferation in prostate cancer. *Prostate*  
551 78:86-94.
- 552 18. Li YL, Weng HC, Hsu JL, Lin SW, Guh JH, Hsu LC. 2019. The Combination  
553 of MK-2206 and WZB117 Exerts a Synergistic Cytotoxic Effect Against  
554 Breast Cancer Cells. *Front Pharmacol* 10:1311.
- 555 19. Bertrand L, Auquier J, Renguet E, Angé M, Cumps J, Horman S, Beauloye C.  
556 2020. Glucose transporters in cardiovascular system in health and disease.  
557 *Pflugers Arch* 472:1385-1399.
- 558 20. Wei M, Lu L, Sui W, Liu Y, Shi X, Lv L. 2018. Inhibition of GLUTs by  
559 WZB117 mediates apoptosis in blood-stage Plasmodium parasites by breaking  
560 redox balance. *Biochem Biophys Res Commun* 503:1154-1159.
- 561 21. Michels PA, Bringaud F, Herman M, Hannaert V. 2006. Metabolic functions  
562 of glycosomes in trypanosomatids. *Biochim Biophys Acta* 1763:1463-77.
- 563 22. Borst P, Fairlamb AH. 1998. Surface receptors and transporters of  
564 *Trypanosoma brucei*. *Annu Rev Microbiol* 52:745-78.

- 565 23. Kashiide T, Kikuta S, Yamaguchi M, Irie T, Kouguchi H, Yagi K, Matsumoto  
566 J. 2018. Molecular and functional characterization of glucose transporter  
567 genes of the fox tapeworm *Echinococcus multilocularis*. *Mol Biochem*  
568 *Parasitol* 225:7-14.
- 569 24. Ojelabi OA, Lloyd KP, Simon AH, De Zutter JK, Carruthers A. 2016.  
570 WZB117 (2-Fluoro-6-(m-hydroxybenzoyloxy) Phenyl m-Hydroxybenzoate)  
571 Inhibits GLUT1-mediated Sugar Transport by Binding Reversibly at the  
572 Exofacial Sugar Binding Site. *J Biol Chem* 291:26762-26772.
- 573 25. Liu Y, Cao Y, Zhang W, Bergmeier S, Qian Y, Akbar H, Colvin R, Ding J,  
574 Tong L, Wu S, Hines J, Chen X. 2012. A small-molecule inhibitor of glucose  
575 transporter 1 downregulates glycolysis, induces cell-cycle arrest, and inhibits  
576 cancer cell growth in vitro and in vivo. *Mol Cancer Ther* 11:1672-82.
- 577 26. Hruz PW, Mueckler MM. 2001. Structural analysis of the GLUT1 facilitative  
578 glucose transporter (review). *Mol Membr Biol* 18:183-93.
- 579 27. Vinaud MC, Ambrosio J. 2020. Metabolic effects of anthelmintic drugs in  
580 the larval stage of the cestode *Taenia crassiceps*, cysticercosis experimental  
581 model - A review. *Acta Trop* 206:105448.
- 582 28. Xin Q, Yuan M, Li H, Song X, Lu J, Jing T. 2019. In vitro and in vivo effects  
583 of 3-bromopyruvate against *Echinococcus metacestodes*. *Vet Res* 50:96.
- 584 29. Zhu J, Thompson CB. 2019. Metabolic regulation of cell growth and  
585 proliferation. *Nat Rev Mol Cell Biol* 20:436-450.

- 586 30. Cui SJ, Xu LL, Zhang T, Xu M, Yao J, Fang CY, Feng Z, Yang PY, Hu W,  
587 Liu F. 2013. Proteomic characterization of larval and adult developmental  
588 stages in *Echinococcus granulosus* reveals novel insight into host-parasite  
589 interactions. *J Proteomics* 84:158-75.
- 590 31. Wu M, Yan M, Xu J, Yin X, Dong X, Wang N, Gu X, Xie Y, Lai W, Jing B,  
591 Peng X, Yang G. 2018. Molecular characterization of triosephosphate  
592 isomerase from *Echinococcus granulosus*. *Parasitol Res* 117:3169-3176.
- 593 32. Chen B, Wen JF. 2011. The adaptive evolution divergence of triosephosphate  
594 isomerases between parasitic and free-living flatworms and the discovery of a  
595 potential universal target against flatworm parasites. *Parasitol Res* 109:283-9.
- 596 33. Velanker SS, Ray SS, Gokhale RS, Suma S, Balaram H, Balaram P, Murthy  
597 MR. 1997. Triosephosphate isomerase from *Plasmodium falciparum*: the  
598 crystal structure provides insights into antimalarial drug design. *Structure*  
599 5:751-61.
- 600 34. Pan W, Shen Y, Han X, Wang Y, Liu H, Jiang Y, Zhang Y, Wang Y, Xu Y,  
601 Cao J. 2014. Transcriptome profiles of the protoscoleces of *Echinococcus*  
602 *granulosus* reveal that excretory-secretory products are essential to metabolic  
603 adaptation. *PLoS Negl Trop Dis* 8:e3392.
- 604 35. Hemer S, Konrad C, Spiliotis M, Koziol U, Schaack D, Förster S, Gelmedin V,  
605 Stadelmann B, Dandekar T, Hemphill A, Brehm K. 2014. Host insulin

- 606 stimulates *Echinococcus multilocularis* insulin signalling pathways and larval  
607 development. *BMC Biol* 12:5.
- 608 36. Baldwin SA, Barros LF, Griffiths M. 1995. Trafficking of glucose  
609 transporters--signals and mechanisms. *Biosci Rep* 15:419-26.
- 610 37. Macheda ML, Rogers S, Best JD. 2005. Molecular and cellular regulation of  
611 glucose transporter (GLUT) proteins in cancer. *J Cell Physiol* 202:654-62.
- 612 38. Tetaud E, Barrett MP, Bringaud F, Baltz T. 1997. Kinetoplastid glucose  
613 transporters. *Biochem J* 325 ( Pt 3):569-80.
- 614 39. Rodriguez-Contreras D, Landfear SM. 2014. Transporters, channels and  
615 receptors in flagella. *Channels (Austin)* 8:477-8.
- 616 40. Hernández-Luis F, Hernández-Campos A, Castillo R, Navarrete-Vázquez G,  
617 Soria-Arteche O, Hernández-Hernández M, Yépez-Mulia L. 2010. Synthesis  
618 and biological activity of 2-(trifluoromethyl)-1H-benzimidazole derivatives  
619 against some protozoa and *Trichinella spiralis*. *Eur J Med Chem* 45:3135-41.
- 620 41. Ko YH, Pedersen PL, Geschwind JF. 2001. Glucose catabolism in the rabbit  
621 VX2 tumor model for liver cancer: characterization and targeting hexokinase.  
622 *Cancer Lett* 173:83-91.
- 623 42. Muhedier M, Li J, Liu H, Ma G, Amahong K, Lin R, Lü G. 2020. Tacrolimus,  
624 a rapamycin target protein inhibitor, exerts anti-cystic echinococcosis effects  
625 both in vitro and in vivo. *Acta Trop* 212:105708.

- 626 43. Loos JA, Cumino AC. 2015. In Vitro Anti-Echinococcal and Metabolic  
627 Effects of Metformin Involve Activation of AMP-Activated Protein Kinase in  
628 Larval Stages of *Echinococcus granulosus*. *PLoS One* 10:e0126009.
- 629 44. Ma Y, Wang W, Idowu MO, Oh U, Wang XY, Temkin SM, Fang X. 2018.  
630 Ovarian Cancer Relies on Glucose Transporter 1 to Fuel Glycolysis and  
631 Growth: Anti-Tumor Activity of BAY-876. *Cancers (Basel)* 11.
- 632 45. Peng Y, Xing SN, Tang HY, Wang CD, Yi FP, Liu GL, Wu XM. 2019.  
633 Influence of glucose transporter 1 activity inhibition on neuroblastoma in vitro.  
634 *Gene* 689:11-17.
- 635 46. Matsumoto T, Jimi S, Migita K, Takamatsu Y, Hara S. 2016. Inhibition of  
636 glucose transporter 1 induces apoptosis and sensitizes multiple myeloma cells  
637 to conventional chemotherapeutic agents. *Leuk Res* 41:103-10.
- 638 47. Chen Q, Meng YQ, Xu XF, Gu J. 2017. Blockade of GLUT1 by WZB117  
639 resensitizes breast cancer cells to adriamycin. *Anticancer Drugs* 28:880-887.
- 640 48. Koch A, Lang SA, Wild PJ, Gantner S, Mahli A, Spanier G, Berneburg M,  
641 Müller M, Bosserhoff AK, Hellerbrand C. 2015. Glucose transporter isoform 1  
642 expression enhances metastasis of malignant melanoma cells. *Oncotarget*  
643 6:32748-60.
- 644 49. Vander Heiden MG, Cantley LC, Thompson CB. 2009. Understanding the  
645 Warburg effect: the metabolic requirements of cell proliferation. *Science*  
646 324:1029-33.

- 647 50. Ganapathy V, Thangaraju M, Prasad PD. 2009. Nutrient transporters in cancer:  
648 relevance to Warburg hypothesis and beyond. *Pharmacol Ther* 121:29-40.
- 649 51. Meng Y, Xu X, Luan H, Li L, Dai W, Li Z, Bian J. 2019. The progress and  
650 development of GLUT1 inhibitors targeting cancer energy metabolism. *Future*  
651 *Med Chem* 11:2333-2352.
- 652 52. Tejada P, Sanchez-Moreno M, Monteoliva M, Gomez-Banqueri H. 1987.  
653 Inhibition of malate dehydrogenase enzymes by benzimidazole anthelmintics.  
654 *Vet Parasitol* 24:269-74.
- 655 53. Schein CH. 2020. Repurposing approved drugs on the pathway to novel  
656 therapies. *Med Res Rev* 40:586-605.
- 657 54. Brockmann K. 2009. The expanding phenotype of GLUT1-deficiency  
658 syndrome. *Brain Dev* 31:545-52.
- 659 55. Wang H, Li J, Zhang C, Guo B, Wei Q, Li L, Yang N, Peter McManus D, Gao  
660 X, Zhang W, Wen H. 2018. *Echinococcus granulosus sensu stricto*: silencing  
661 of thioredoxin peroxidase impairs the differentiation of protoscoleces into  
662 metacestodes. *Parasite* 25:57.
- 663 56. Walker M, Rossignol JF, Torgerson P, Hemphill A. 2004. In vitro effects of  
664 nitazoxanide on *Echinococcus granulosus* protoscoleces and metacestodes. *J*  
665 *Antimicrob Chemother* 54:609-16.
- 666 57. Loos JA, Davila VA, Rodrigues CR, Petrigh R, Zoppi JA, Crocenzi FA,  
667 Cumino AC. 2017. Metformin exhibits preventive and therapeutic efficacy



- 668           against experimental cystic echinococcosis. *PLoS Negl Trop Dis*  
669           11:e0005370.
- 670   58.    Elissondo M, Ceballos L, Dopchiz M, Andresiuk V, Alvarez L, Bruni SS,  
671           Lanusse C, Denegri G. 2007. In vitro and in vivo effects of flubendazole on  
672           *Echinococcus granulosus* metacestodes. *Parasitol Res* 100:1003-9.
- 673   59.    Fabbri J, Maggiore MA, Pensel PE, Denegri GM, Gende LB, Elissondo MC.  
674           2016. In vitro and in vivo efficacy of carvacrol against *Echinococcus*  
675           *granulosus*. *Acta Trop* 164:272-279.
- 676   60.    Wen H, New RR, Muhmut M, Wang JH, Wang YH, Zhang JH, Shao YM,  
677           Craig PS. 1996. Pharmacology and efficacy of liposome-entrapped  
678           albendazole in experimental secondary alveolar echinococcosis and effect of  
679           co-administration with cimetidine. *Parasitology* 113 ( Pt 2):111-21.
- 680   61.    You H, Zhang W, Moertel L, McManus DP, Gobert GN. 2009.  
681           Transcriptional profiles of adult male and female *Schistosoma japonicum* in  
682           response to insulin reveal increased expression of genes involved in growth  
683           and development. *Int J Parasitol* 39:1551-9.
- 684   62.    Cumino AC, Lamenza P, Denegri GM. 2010. Identification of functional FKB  
685           protein in *Echinococcus granulosus*: its involvement in the protoscolicidal  
686           action of rapamycin derivatives and in calcium homeostasis. *Int J Parasitol*  
687           40:651-61.

- 688 63. Rai S, Agrawal C, Shrivastava AK, Singh PK, Rai LC. 2014. Comparative  
689 proteomics unveils cross species variations in *Anabaena* under salt stress. *J*  
690 *Proteomics* 98:254-70.
- 691 64. Gulyaeva AA, Sigorskih AI, Ocheredko ES, Samborskiy DV, Gorbalenya AE.  
692 2020. LAMPA, LARge Multidomain Protein Annotator, and its application to  
693 RNA virus polyproteins. *Bioinformatics* 36:2731-2739.
- 694 65. Mizukami C, Spiliotis M, Gottstein B, Yagi K, Katakura K, Oku Y. 2010.  
695 Gene silencing in *Echinococcus multilocularis* protoscoleces using RNA  
696 interference. *Parasitol Int* 59:647-52.
- 697 66. Li J, Zhang WB, McManus DP. 2004. Recombinant antigens for  
698 immunodiagnosis of cystic echinococcosis. *Biol Proced Online* 6:67-77.
- 699 67. Vuitton DA, McManus DP, Rogan MT, Romig T, Gottstein B, Naidich A,  
700 Tuxun T, Wen H, Menezes da Silva A. 2020. International consensus on  
701 terminology to be used in the field of echinococcoses. *Parasite* 27:41.  
702

703 **Figures**

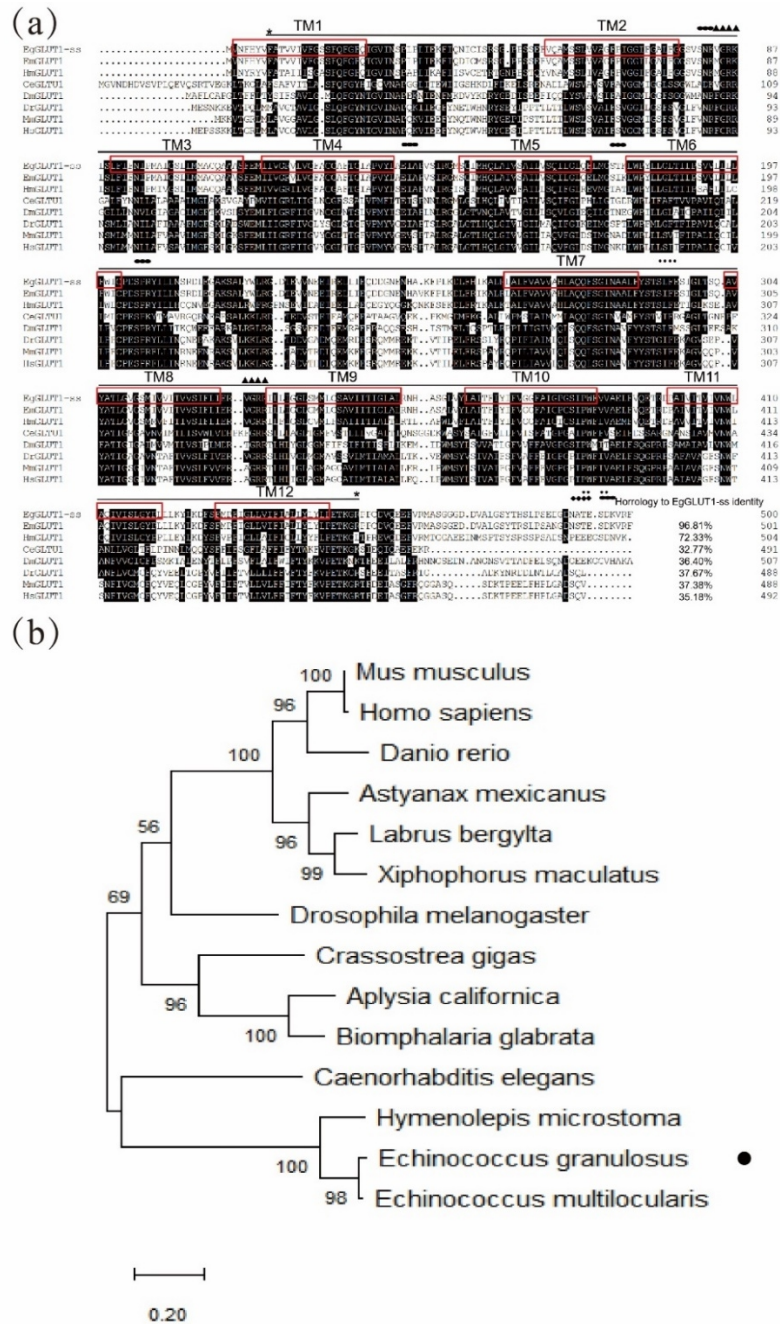

704

705 **Figure 1. EgGLUT1-ss bioinformatics analysis and its expression level in the**

706 **metacestode of *E. granulosus* s.s. (a) Multiple-sequence alignments of EgGLUT1-ss**

707 **from *E. granulosus* s.s. (accession number: MW393831); *Echinococcus***

708 ***multilocularis* (accession number CDS42031.1); *Hymenolepis microstoma* (accession**

709 number CDS25463.1); *Caenorhabditis elegans* (accession number NP\_493981.1);  
710 *Drosophila melanogaster* (accession number NP\_001097467.1); *Danio rerio*  
711 (accession number NP\_001034897.1); *Mus musculus* (accession number  
712 XP\_006502971.1); and *Homo sapiens* (accession number NP\_006507.2). The  
713 horizontal line between the two \* represents the MFS super family; (▲) denotes the  
714 amidation site; (◆) denotes the glycosylation site; (·) denotes Casein kinase II  
715 phosphorylation site; (●) denotes protein kinase C phosphorylation site; The red box  
716 represents the transmembrane (TM) region. (b) Phylogenetic tree constructed using  
717 the neighbor-joining method to compare the relationship between EgGLUT1-ss and  
718 GLUT1 from other species. The numbers above the branches refer to bootstrap values.  
719 The species for sequences included in the phylogenetic analysis are shown behind the  
720 branches. EgGLUT1-ss from *E. granulosus s.s.* is indicated by •.  
721

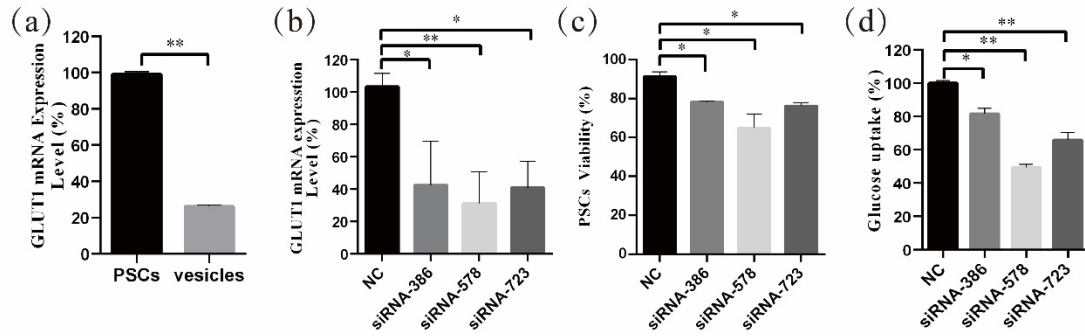

722

723 **Figure 2. EgGLUT1-ss Knockdown reduces the viability and glucose uptake of**

724 **PSCs.** (a) EgGLUT1-ss mRNA expression in PSCs and vesicles. (b) EgGLUT1-ss

725 mRNA expression at 48 h after siRNA-386/578/723 interference. (c) PSCs viability at

726 48 h after siRNA-386/578/723 interference. (d) Glucose uptake of PSCs at 48 h after

727 siRNA-386/578/723 interference. NC: negative control group (transfection by

728 independent interference sequence). \* and \*\* indicate that the difference was

729 statistically significant (\* $P < 0.05$ ; \*\* $P < 0.01$ ).

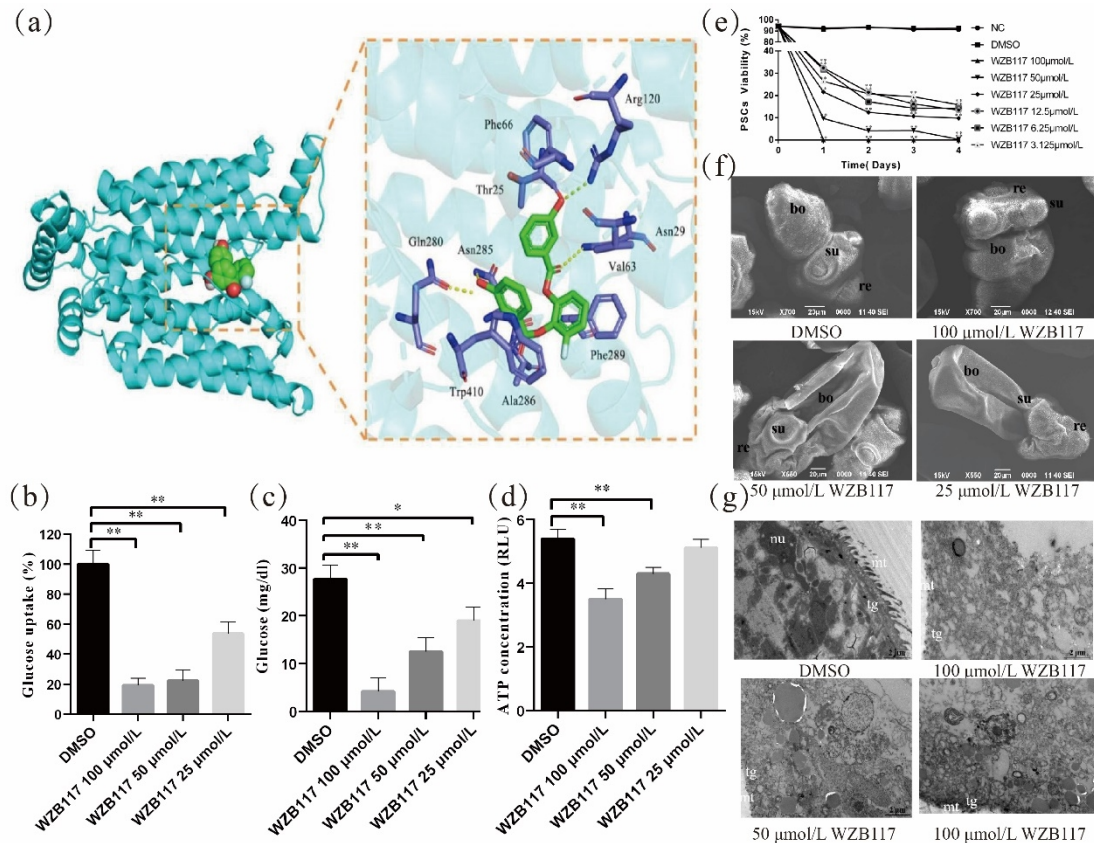

730

731 **Figure 3. WZB117 inhibits glucose metabolism and reduces the viability of PSCs**

732 *in vitro*. (a) Docked structure and interactions of WZB117 binding to EgGLUT1-ss.

733 The image on the left shows that WZB117 binds to the central channel region of

734 EgGLUT1-ss. The image on the right shows the detailed interactions (formation of 4

735 hydrogen bonds) between WZB117 and amino acid residues of EgGLUT1-ss. (b)

736 Glucose uptake of PSCs after WZB117 incubation for 60 min. (c) Glucose content of

737 PSCs after WZB117 incubation for 48 h. (d) ATP content of PSCs after WZB117

738 incubation for 48 h. (e) PSCs viability after WZB117 intervention for 4 days. Data are

739 the mean ± S.D. of three independent experiments. (f) Representative SEM images of

740 PSCs after WZB117 incubation for 4 days. PSCs incubated in culture medium

741 containing DMSO served as a control. (g) Representative TEM images of PSCs after

742 WZB117 intervention for 4 days. PSCs incubated in culture medium containing  
743 DMSO served as a control. NC: negative control group; DMSO: control group. \* and  
744 \*\* indicate that the difference was statistically significant ( $*P < 0.05$ ,  $**P < 0.01$ )  
745 compared with control group. re, rostellum; su, suckers; bo, body; mt, microtriches;  
746 nu, nucleus; tg, tegument.



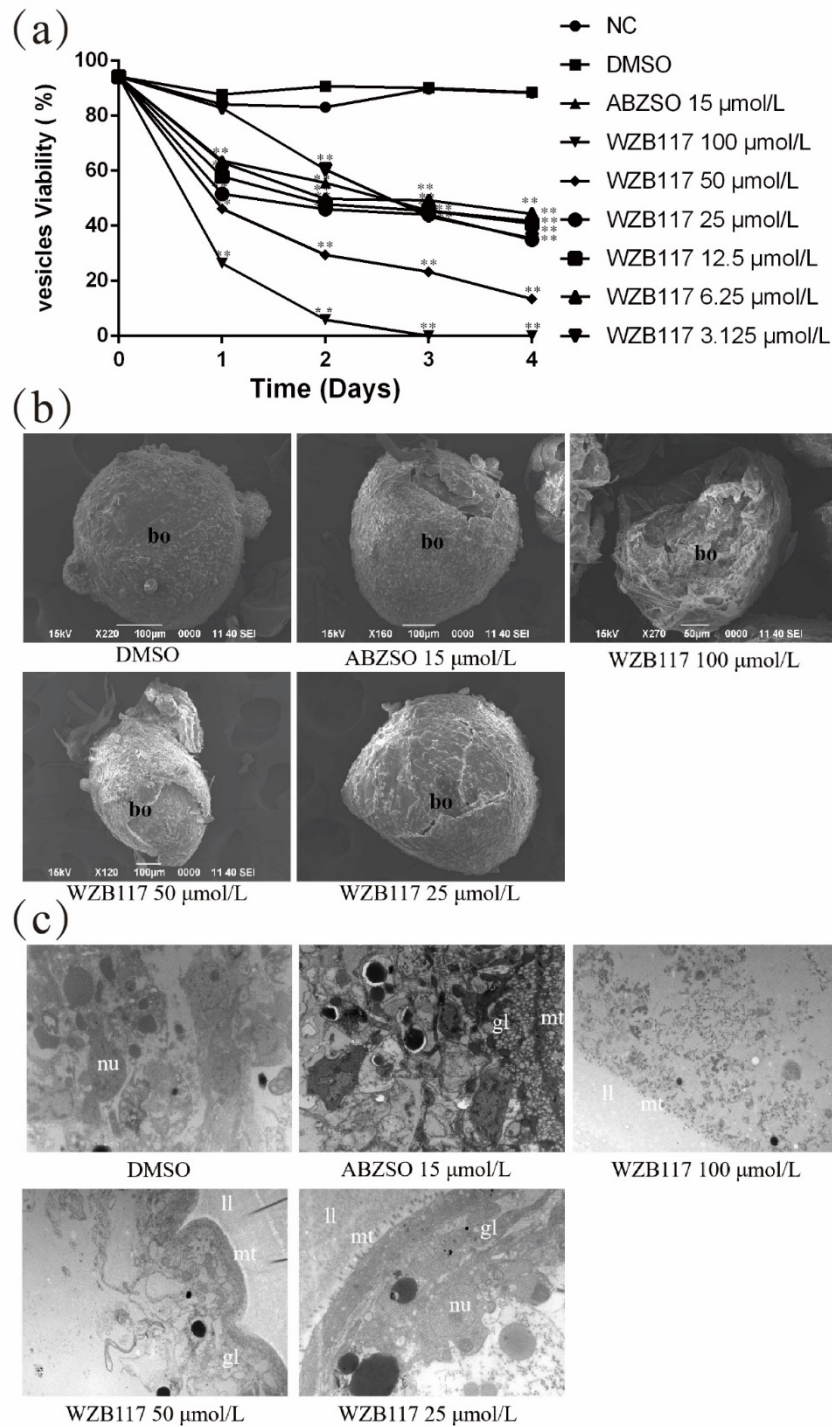

747

748 **Figure 4. WZB117 reduces the viability of *E. granulosus* s.s. vesicles *in vitro*.** (a)

749 Vesicle viability of *E. granulosus* s.s. after WZB117 incubation for 4 days. NC:

750 negative control group; DMSO: control group. \* and \*\* indicate that the difference

751 was statistically significant (\* $P < 0.05$ , \*\* $P < 0.01$ ) compared with control group. (b)



752 Representative SEM images of vesicles after WZB117 incubation for 4 days. Vesicles  
753 incubated in culture medium containing DMSO served as a control. (c) Representative  
754 TEM images of vesicles after WZB117 incubation for 4 days. Vesicles incubated in  
755 culture medium containing DMSO served as a control. bo, body; gl, germinal layer; ll,  
756 laminated layer; mt, microtriches; nu, nucleus.

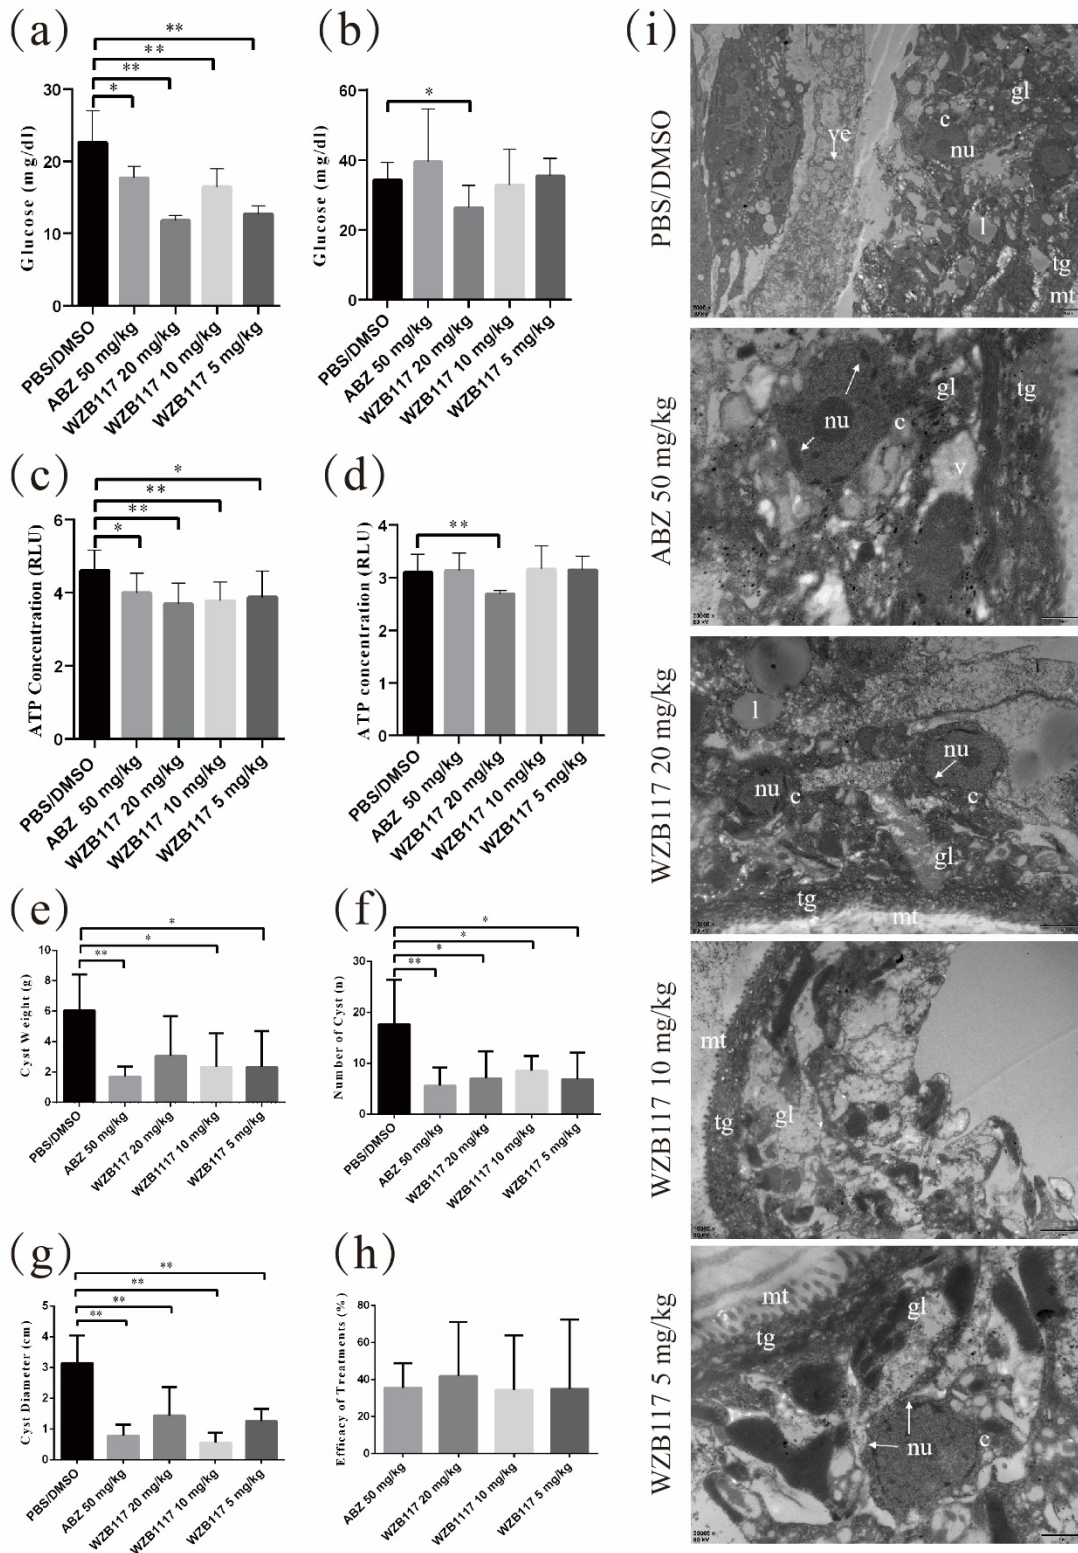

757

758 **Figure 5. WZB117 treatment effectively inhibits the growth of cysts and reduces**

759 **glucose and ATP levels in *E. granulosus s.s.*-infected mice. (a) Glucose content of**

760 cyst tissue in *E. granulosus s.s.*-infected mice after WZB117 treatment for 28 days. (b)  
761 Glucose content in the cyst fluid after WZB117 treatment for 28 days. (c) ATP  
762 content in the cyst tissue. (d) ATP content in the cyst fluid. (e) Cyst weight in *E.*  
763 *granulosus s.s.*-infected mice. (f) Cyst number in *E. granulosus s.s.*-infected mice. (g)  
764 Cyst diameter in *E. granulosus s.s.*-infected mice. (h) Efficacy of 28-days treatments  
765 in *E. granulosus s.s.*-infected mice. (i) Representative TEM images of cysts in *E.*  
766 *granulosus s.s.*-infected mice. PBS/DMSO: control group. \* and \*\* indicate that the  
767 difference was statistically significant ( $*P < 0.05$ ,  $**P < 0.01$ ) compared with control  
768 group. gl, germinal layer; ll, laminated layer; tg, tegument; l, lipid droplet; mt,  
769 microtriches; nu, nucleus; c, cell; arrow, broken nucleus.

770 **Table 1. Design of the potential three siRNA sequences targeting EgGLUT1-ss**

771 **gene**

---

| siRNA ID  | Sense sequences       | Antisense sequences    |
|-----------|-----------------------|------------------------|
| siRNA-386 | GGAUUGAACCUGGUCCGAUTT | AUCGGACCAGGUUCAAUCCCTT |
| siRNA-578 | CCACGGUGAUGACAACAAUTT | AUUGUUGUCAUCACCGUGGTT  |
| siRNA-723 | GGCAACAAAGAGAGCCAAATT | UUUGGCUCUCUUUGUUGCCTT  |

---

772

773

774

**Table 2. EgGLUT1-ss Gene primer sequences**

| Gene           | Primer | Sequence 5'-3'                            |
|----------------|--------|-------------------------------------------|
| EgGLUT1-ss     | Fw     | 5'- TTCTTCTTATAGGCGGTCTC -3'              |
|                | Rv     | 5'- AGGTGATGGCAAGGTAGA -3'                |
| $\beta$ -actin | Fw     | 5'-GCGATGTATGTAGCTATCCAGGCAGTGCTCTCGCT-3' |
|                | Rv     | 5'-CAATCCAGACAGAGTATTTGCGTTCCGGAGGA-3'    |

775
